# Supplementary material
Source: PubMed Central journal article supplement (PMC7963827)
Supplement: 16-00097.pdf [file 16-00097.pdf]

**On-line Table 1: Subgroup analysis for factors associated diagnostic accuracy**

| Study Outcomes        | Diagnostic Accuracy | False-Positive and False-Negative Results | P Value |
|-----------------------|---------------------|-------------------------------------------|---------|
| Nodule size (mm)      |                     |                                           |         |
| <10 mm                | 432 (94.9%)         | 23 (5.1%)                                 | .012    |
| ≥10 mm                | 728 (97.7%)         | 17 (2.3%)                                 |         |
| Composition (No.) (%) |                     |                                           |         |
| Solid                 | 1026 (96.2%)        | 40 (3.8%)                                 | .265    |
| Predominantly solid   | 75 (100.0%)         | 0                                         |         |
| Predominantly cystic  | 58 (100.0%)         | 0                                         |         |
| Cystic                | 1 (100.0%)          | 0                                         |         |
| Location              |                     |                                           |         |
| Upper/lower           | 633 (96.9%)         | 20 (3.1%)                                 | .568    |
| Mid                   | 527 (96.3%)         | 20 (3.7%)                                 |         |

**On-line Table 2: Histologic diagnosis at core needle biopsy and subsequent operation in 572 nodules**

| Diagnosis at CNB (No. of Nodes) | Surgical Diagnosis (No. of Nodes)                                                                                                                        |
|---------------------------------|----------------------------------------------------------------------------------------------------------------------------------------------------------|
| Nondiagnostic (14)              | Adenomatous hyperplasia (5)<br>Follicular adenoma (1)<br>Papillary carcinoma (7)<br>FVPTC (1)                                                            |
| Benign (147)                    | Adenomatous hyperplasia (113)<br>Follicular adenoma (12)<br>Papillary carcinoma (8)<br>Thyroiditis (12)<br>Hurthle cell adenoma (2)                      |
| AUS or FLUS (48)                | Adenomatous hyperplasia (13)<br>Follicular adenoma (16)<br>Papillary carcinoma (13)<br>Follicular carcinoma (1)<br>Hurthle cell adenoma (3)<br>FVPTC (2) |
| FN or SFN (24)                  | Adenomatous hyperplasia (2)<br>Follicular adenoma (11)<br>Papillary carcinoma (4)<br>Follicular carcinoma (4)<br>Hurthle cell adenoma (3)                |
| Suspicious for malignancy (21)  | Papillary carcinoma (18)<br>FVPTC (3)                                                                                                                    |
| Malignancy (318)                | Diffuse large B-cell lymphoma (2)<br>Anaplastic carcinoma (1)<br>Medullary carcinoma (2)<br>Papillary carcinoma (309)<br>FVPTC (4)                       |

**Note:**—FVPTC indicates follicular variant of papillary carcinoma; FN, follicular neoplasm; SFN, suspicious for a follicular neoplasm.

**On-line Table 3: Summary of diagnostic performances of CNB for the diagnosis of malignancy in published studies**

| Author, Year                        | Sensitivity     | PPV             | Specificity     | NPV             | Diagnostic Accuracy | Conclusive        | Inconclusive     | ND              | Major/Minor Complication     |
|-------------------------------------|-----------------|-----------------|-----------------|-----------------|---------------------|-------------------|------------------|-----------------|------------------------------|
| Present study                       | 89.7% (347/387) | 100% (347/347)  | 100% (813/813)  | 95.3% (813/853) | 96.7% (1160/1200)   | 88.1% (2093/2376) | 11.9% (283/2376) | 4.9% (117/2376) | 0/0.5% (12/2376)             |
| Sung et al <sup>15</sup> , 2012     | 86.8% (276/318) | 99.3% (276/278) | 99.2% (235/237) | 84.8% (235/277) | 92.1% (511/555)     | 87.2% (484/555)   | 12.8% (71/555)   | 1.4% (8/555)    | 0/3.3% (18/555)              |
| Yeon et al <sup>14</sup> , 2013     | 94.6% (35/37)   | 100% (35/35)    | 100% (79/79)    | 97.5% (79/81)   | 98.3% (114/116)     | 87.1% (135/155)   | 12.9% (20/155)   | 1.3% (2/155)    | 0/1.9% (3/155)               |
| Ha et al <sup>25</sup> , 2014       | 89.5% (94/105)  | 100% (94/94)    | 100% (101/101)  | 90.2% (101/112) | 94.7% (195/206)     | 90.1% (245/272)   | 9.9% (27/272)    | 0.7% (2/272)    | 0/1.1% (3/272)               |
| Trimboli et al <sup>17</sup> , 2014 | 100% (24/24)    | 100% (24/24)    | —               | —               | 96.8% (30/31)       | 96.8% (30/31)     | 3.2% (1/31)      | 3.2% (1/31)     | 0                            |
| Suh et al <sup>19</sup> , 2016      | 90% (190/211)   | 100% (190/190)  | 100% (253/253)  | 92.3% (253/274) | 97.6% (414/424)     | 94.2% (595/632)   | 5.9% (37/632)    | 1.3% (8/632)    | 0/0.2% (1/632)               |
| Paja et al <sup>18</sup> , 2016     | 80.1% (145/181) | 98.0% (145/148) | 99.4% (492/495) | 93.2% (492/528) | 94.2% (637/676)     | —                 | —                | 5.8% (204/3517) | 0.0% (1/3517)/1.6% (56/3517) |

**Note:**—ND indicates nondiagnostic.
